# Supplementary material for: Dengue virus antibody database: Systematically linking serotype-specificity with epitope mapping in dengue virus
Source: PubMed Central journal article supplement (PMC5336305; doi:10.1371/journal.pntd.0005395), 2017-02-21
Supplement: pntd.0005395.s006.pdf [file pntd.0005395.s006.pdf]

| Name                                    | GenBank  |
|-----------------------------------------|----------|
| DENV2/India/1974-Poona-742295           | FJ538920 |
| DENV2/NewGuinea/1944-NewGuineaC         | AF038403 |
| DENV2/Vietnam/2006-32-135               | EU482672 |
| DENV2/Nicaragua/2006-BID-V571           | EU482684 |
| DENV2/Nicaragua/2005-BID-V533           | EU482756 |
| DENV2/Brazil/2004-BR-161                | KT382189 |
| DENV2/Guyana/2000-CAREC-00-08221        | KT382188 |
| DENV2/Vietnam/2003-AC21                 | KT452796 |
| DENV2/Vietnam/2003/DF670-AC20           | KT452797 |
| DENV2/Cambodia/2008-BID-V3924           | GQ868638 |
| DENV2/Cambodia/2009/D2T0601085_KH09_KSP | KT452795 |
| DENV2/Cambodia/2007/BID-V4265           | GU131927 |
| DENV2/Peru/1996-IQT-2913                | AY158339 |
| DENV2/Tonga/1974-Tonga/74               | AY744147 |
| DENV2/Malaysia/2008-DKD-811             | FJ467493 |
| DENV2/Senegal/1970/Sendak_H             | EF105384 |
| DENV3/Indonesia/1978/Sleman-1280-AC25   | KT452798 |
| DENV3/Vietnam/2006-BID-V1329            | EU660409 |
| DENV3/Vietnam/2007-BID-V1817            | FJ432743 |
| DENV3/Myanmar/2008/80931                | KT452792 |
| DENV3/Cambodia/2011/V0907330-AC23       | KT452799 |
| DENV3/Fiji/1992-29472-L11422-I          | L11422   |
| DENV3/PuertoRico/2006-429965            | EU529698 |
| DENV3/Nicaragua/2009-BID-V4753          | HQ541806 |
| DENV3/Puerto-Rico/1963/PRS-228762-AC27  | KT452800 |
| DENV1/Thailand/1964-16007               | AF180817 |
| DENV1/Nauru/1974-WestPac                | AY145121 |
| DENV1/PuertoRico/2006-BID-V852          | EU482591 |
| DENV1/Bolivia/2010-FSB-3363             | KT382187 |
| DENV1/Venezuela/2000-OBT-1298           | KT382186 |
| DENV1/Peru/2000-IQT-6152                | AY780643 |
| DENV1/Vietnam/2008-BID-V1937            | FJ461335 |
| DENV1/Cambodia/2003-BID-V1995           | FJ639680 |
| DENV1/Cambodia/2003-BID-V1991           | GQ868619 |
| DENV1/Myanmar/2005/61117                | KT452791 |
| DENV4/Indonesia/1973/M30153-AC36        | KT452801 |
| DENV4/Indonesia/1978-S1228              | JN022608 |
| DENV4/Dominica/1981-42A                 | AF326573 |
| DENV4/PuertoRico/1998-347751            | EU854297 |
| DENV4/PuertoRico/1999-BID-V2446         | FJ882599 |
| DENV4/Nicaragua/1999-703                | KT452803 |
| DENV4/Brazil/2012/BR-12                 | KT452794 |
| DENV4/Thailand/1985-D85-052             | AY780644 |
| DENV4/Cambodia/2010-U0811386            | KF543272 |
| DENV4/Cambodia/2011/V0624301-AC33       | KT452802 |
| DENV4/Myanmar/2008/81087                | KT452793 |
| DENV4/Malaysia/1973/P73-1120            | JF262780 |
